# Supplementary material for: Transfer hydrogenation of aldehydes on amphiphilic catalyst assembled at the interface of emulsion droplets
Source: Royal Society of Chemistry journal article supplement (doi:10.1039/b803209b), 2008-01-01
Supplement: b803209b.pdf [file b803209b.pdf]

# Supporting Information for

## Transfer Hydrogenation of Aldehydes on Amphiphilic Catalyst Assembled at the Interface of Emulsion Droplets

Jun Li, Yanmei Zhang, Difei Han, Guoqing Jia, Jinbo Gao, Lin Zhong and Can Li\*

[\*] *State Key Laboratory of Catalysis, Dalian Institute of Chemical Physics, Chinese Academy of Sciences, 457 Zhongshan Road, Dalian 116023, China*

Fax: (+86) 411-8469-4447

Email: [canli@dicp.ac.cn](mailto:canli@dicp.ac.cn);

Homepage: <http://www.canli.dicp.ac.cn>

### Contents

|                                                                   |      |
|-------------------------------------------------------------------|------|
| General experimental details                                      | S2-3 |
| Results of recycling of PTsEN                                     | S3   |
| Photographs of catalyst <b>Ir-PTsEN</b> under reaction conditions | S4   |
| Fluorescence Measurements                                         | S4   |
| <sup>1</sup> H NMR of ligand <b>PTsEN</b>                         | S5   |

**General experimental details:**  $^1\text{H}$  NMR spectrum was recorded on a Bruker AV500 (500 MHz) instrument using  $\text{D}_2\text{O}$  as the solvent at  $85\text{ }^\circ\text{C}$ . Chemical shifts ( $\delta$ ) are reported in ppm relative to residual solvent signals ( $\text{H}_2\text{O}$ , 4.18 ppm for  $^1\text{H}$  NMR).<sup>1</sup> Fluorescence spectra were recorded at room temperature on an Edinburgh FLS920 fluorescence spectrometer. The emission spectra were recorded by excitation at 340 nm.

Monomer **2** (4-vinylbenyl)-trimethyl ammonium chloride and  $[(\text{Cp}^*\text{IrCl}_2)_2]$  ( $\text{Cp}^*=\text{C}_5\text{Me}_5$ ) was obtained from Aldrich Chemical Co. DMF was dried and distilled before use following standard procedures. Benzaldehyde and furfural were freshly distilled before use. All other reagents were used without purification as commercially available.

### General procedure for the preparation of PTsEN

Monomer **1** (150 mg, 0.66 mmol) and monomer **2** (168 mg, 0.84 mmol) were added to a solution of anhydrous DMF (5 mL) with AIBN (10 mg, 0.06 mmol). The mixture was degassed for three times of freeze–thaw under liquid nitrogen. Polymerization was carried out at  $60\text{ }^\circ\text{C}$  for 24 h under argon. After filtration, the residue was washed by DMF and  $\text{CH}_2\text{Cl}_2$  in turn, and dried in vacuo to give **PTsEN** (299 mg, 94% yield ).as white solid.  $\delta_{\text{H}}$  (500 MHz,  $\text{D}_2\text{O}$ ,  $85\text{ }^\circ\text{C}$ ) 1.66 ppm (br, CH,  $\text{CH}_2$ , the backbone of polymer), 2.88 (br,  $\text{CH}_2\text{N}$ ), 3.11 (br,  $\text{N}(\text{CH}_3)_3$ ), 4.46 (br,  $\text{CH}_2\text{Ph}$ ), 6.49-7.10, 7.10-7.48, 7.50-7.91 (br, Ar – H). The molar ratio of the monomers was determined by  $^1\text{H}$  NMR analysis (monomer **1** : monomer **2** = 0.43 : 0.57).

### Typical procedure for transfer hydrogenation of aldehydes

The reduction of benzaldehyde at  $\text{S}/\text{Ir} = 10000:1$  was carried out as following: **PTsEN** (9 mg, containing 0.018 mmol monomer **1**) and  $[(\text{Cp}^*\text{IrCl}_2)_2]$  (1.6 mg, 0.002 mmol) were suspended in degassed

distilled water (15 mL) under argon. After stirred at 80 °C for 1 h, Benzaldehyde (4.2 g, 40 mmol) and HCOONa (5.4 g, 80 mmol) were quickly added to the resulting solution. The conversion was monitored by GC (equipped with HP 19091G-B213 column). The reaction mixture was cooled to room temperature after completion, and the product was extracted with ethyl ether (3×10 mL). The ethereal phase was removed with syringe. A new reaction could be conducted by adding benzaldehyde (40 mmol) and a equiv formic acid in turn.

**Table S1** Catalytic activities of transfer hydrogenation of benzaldehyde using **Ir-PTsEN** in three consecutive cycles.<sup>a</sup>

| Cycles | Conv (%) |
|--------|----------|
| 1      | 99       |
| 2      | 67       |
| 3      | 39       |

<sup>a</sup> Product is extracted with diethyl ether. Reaction conditions: 80 °C, HCOONa (2.0 equiv), water (15 mL), S/Ir 1 × 10<sup>4</sup>:1, reaction time 6 min.

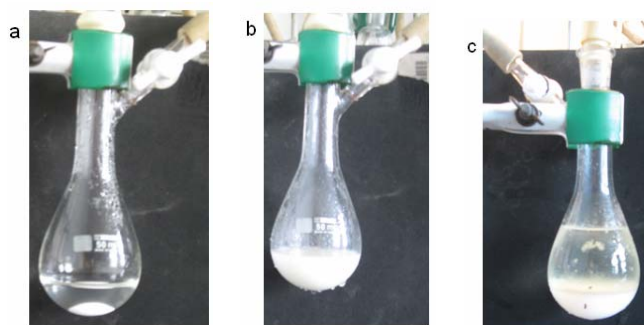

**Fig. S1.** Photographs of catalyst **Ir-PTsEN** under the reaction conditions. a) **Ir-PTsEN** in water (15 mL). b) **Ir-PTsEN** in the emulsion system consisting of benzaldehyde (40 mmol), water (15 mL) and HCOONa (2 equiv). c) After reaction completion, ethyl ether is added to the mixture of reaction.

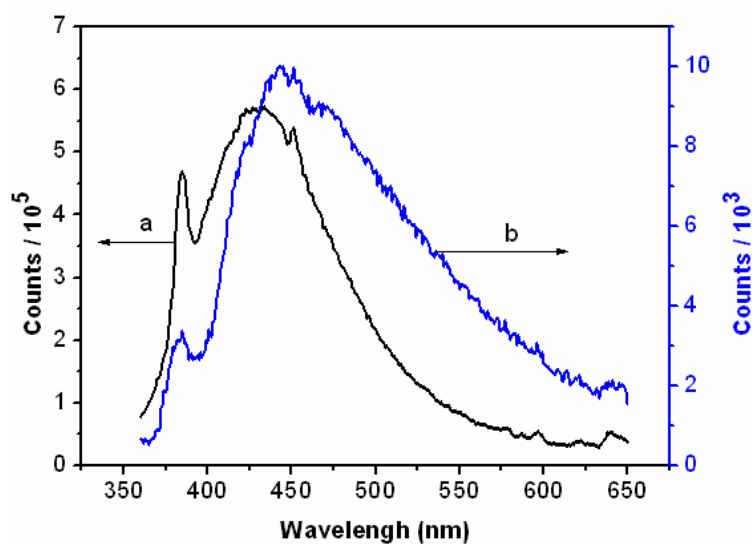

**Fig. S2.** Fluorescence spectra a) **Ir-PTsEN** in water (15 mL). b) **Ir-PTsEN** in the emulsion system consisting of benzaldehyde (40 mmol) and water (15 mL).

References:

- [1] H. E. Gottlieb, V. Kotlyar, and A. Nudelman, *J. Org. Chem.*, 1997, **62**, 7512-7515.

1H sample: 1ljun in D2O

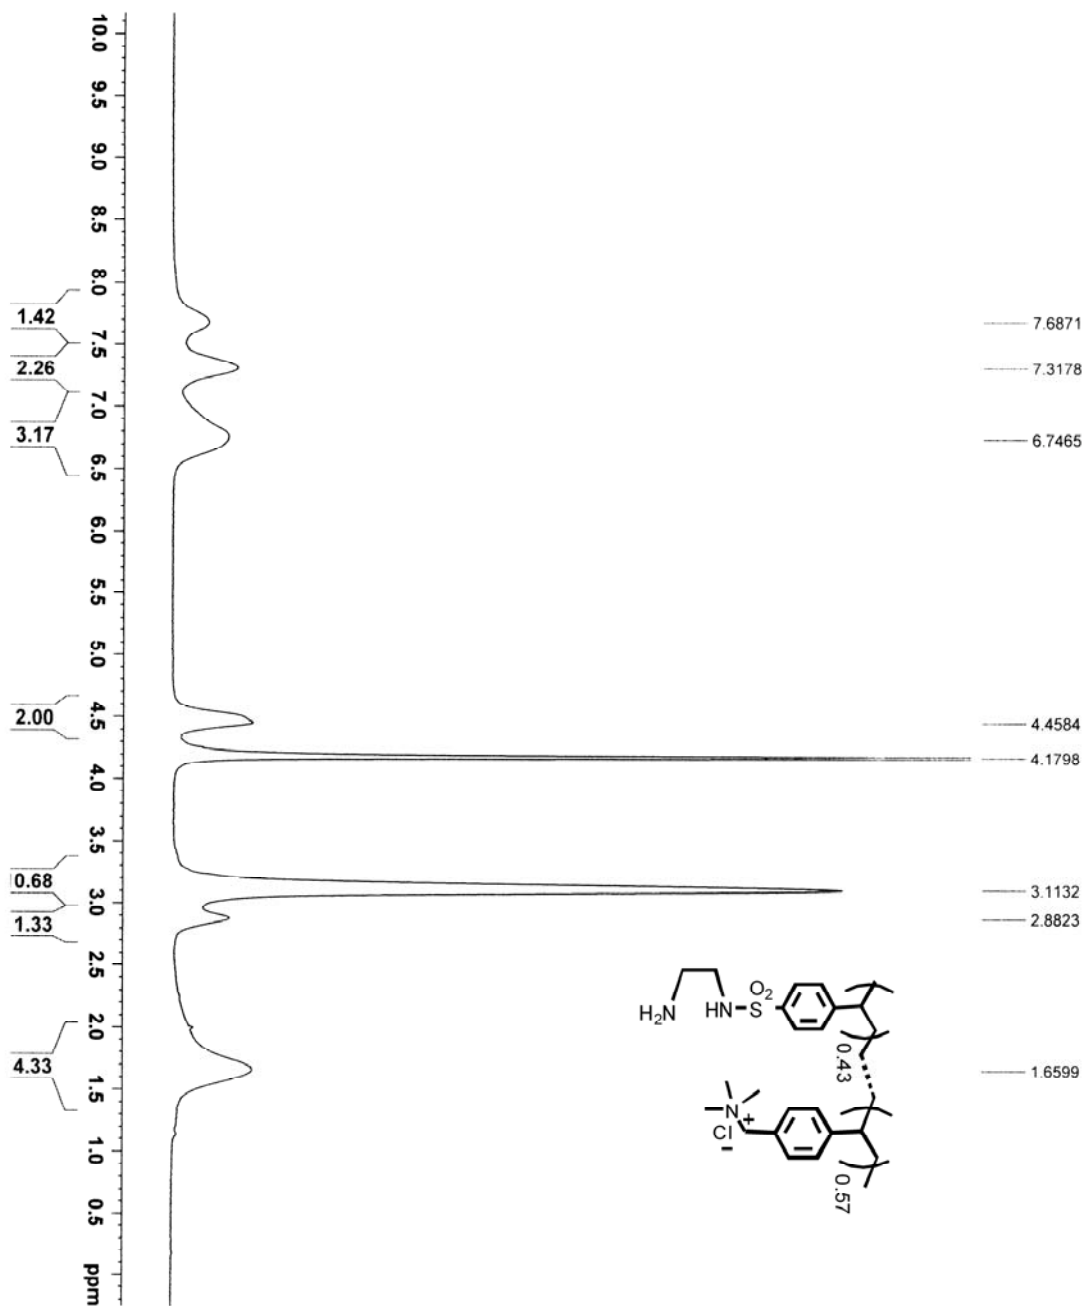

Current Data Parameters  
 NAME 1ljun  
 EXPNO 1  
 PROCNO 1

F2 - Acquisition Parameters  
 Date\_ 20070712  
 Time 9.36  
 INSTRUM AV500  
 PROBHD 5 mm BBO BB-1H  
 PULPROG zg30  
 TD 32768  
 SOLVENT D2O  
 NS 64  
 DS 2  
 SWH 13020.833 Hz  
 FIDRES 0.397364 Hz  
 AQ 1.2583796 sec  
 RG 181  
 DK 38.400 usec  
 DE 8.00 usec  
 TR 358.2 K  
 DI 2.00000000 sec  
 T10 1

===== CHANNEL f1 =====  
 NUCL1 1H  
 P1 10.25 usec  
 PL1 0.00 dB  
 SFO1 500.1330008 MHz

F2 - Processing parameters  
 SI 32768  
 SF 500.1302965 MHz  
 WTM EM  
 SSB 0  
 LB 0.30 Hz  
 GB 0  
 PC 1.00
